# Supplementary material for: Optimizing Obesity Treatment in Children to Adolescent: A Network Meta-Analysis and Meta-Regression of HIIT vs Other Exercise Modalities on Cardiometabolic Markers
Source: Research Square preprint supplement (doi:10.21203/rs.3.rs-8292093/v1), 2025-12-18
Supplement: Supplementary file 2 [file 636d68fe5e165842595c29a2.xlsx]

## Sheet: FIX (EXTRACT)
Notes
Left single leg stance balance			No	Studies	Country	Design	Intervention	Intervention HIIT (durasi)	Invention HIIT (type) : running / cycling / dll	Patients	per group	Follow-up	Gender		Mean Age			BMI ✅						%BF (%) ✅						FM ✅						FFM ✅						WC (cm) ✅						VAT (g)
cs-30																		Baseline			After			Baseline			After			Baseline			After			Baseline			After			Baseline			After			Baseline
													Male	Female	HIIT	MICT	CON	HIIT	MICT	CON	HIIT	MICT	CON	HIIT	MICT	CON	HIIT	MICT	CON	HIIT	MICT	CON	HIIT	MICT	CON	HIIT	MICT	CON	HIIT	MICT	CON	HIIT	MICT	CON	HIIT	MICT	CON	HIIT	MICT
RMI (Rivermead Mobility Index)			1	Meng et al. (2022)	China	RCT	HIIT MICT CON	Exercise training with HIIT or MICT was 3 separate days per week (e.g., Monday, Wednesday and Friday) for 12weeks. All training sessions were carried out on an outdoor track. Training sessions were always preceded by a 5-min warm-up and cool-down at 55 ~ 60% HRmax. For MICT, participants ran 30-min at 60% of MAS during the first 4weeks, then the training intensity was increased to 65% for weeks 5…	RUNNING	36	2013-11-12	12 weeks			11.4 ± 0.8	11.2 ± 0.7	11.0 ± 0.7	24.5 ± 1.1	24.4 ± 0.9	23.8 ± 0.8	22.7 ± 1.0 #, £	23.2 ± 0.7 #	24.8 ± 1.0	38.4 ± 4.0	37.5 ± 2.0	38.3 ± 1.6	36.2 ± 3.9 £	34.4 ± 1.5	39.5 ± 2.1	21.7 ± 2.2	22.0 ± 4.6	20.5 ± 2.0	19.3 ± 1.7	18.3 ± 3.4	23.3 ± 2.6*	30.2 ± 3.6	30.2 ± 5.4	28.7 ± 2.5	32.1 ± 4.5	29.4 ± 4.3	30.5 ± 3.0	83.8 ± 7.4	79.2 ± 5.6	82.5 ± 7.1	78.8 ± 6.1	78.5 ± 7.5	84.9 ± 7.2	348±55	313±86
								HIIT: 8 rep x 2 sets (8 min) Rest between sets: 3 min 4 min - 3 min (rest) - 4 min = 11min 3x / week
			No	Studies	Country	Design	Intervention	Intervention HIIT (durasi)	Invention HIIT (type) : running / cycling / dll	Patients	per group	Follow-up	Gender		Mean Age			VO2 peak (L/min)						VO2peak (ML/kg/min) ✅						BMI (kg/m2) ✅						Total body fat (%) ✅						Total Fat mass (kg) ✅						Total FFM (kg) ✅
																		Baseline			After			Baseline			After			Baseline			After			Baseline			After			Baseline			After			Baseline
													Male	Female	HIIT	MICT	Nutrition	HIIT (33)	MICT (29)	CON (31)	HIIT (22)	MICT (25)	CON (26)	HIIT (33)	MICT (29)	CON (31)	HIIT (22)	MICT (25)	CON (26)	HIIT (33)	MICT (32)	CON (34)	HIIT (23)	MICT (25)	CON (26)	HIIT (25)	MICT (27)	CON (28)	HIIT (18)	MICT (22)	CON (16)	HIIT (25)	MICT (27)	CON (28)	HIIT (18)	MICT (22)	CON (16)	HIIT (25)	MICT (27)
			2	Dias et al.	Australia and Norway	RCT	HIIT MICT Nutrition	40min The exercise groups (HIIT and MICT) trained three times each week for 12 weeks and all participants received between four and six , 20–30 min nutrition consultations with a dietitian over the 12-week period. 12-week intervention as follows: (1) HIIT [n = 33, 4 x 4-min bouts at 85–95% maximum heart rate (HRmax), interspersed with 3 min of active recovery at 50–70% HRmax, 3 times/week	Treadmill	99	*beda" per intervention	12 weeks	HIIT: 26 MICT: 12 Nutrition: 12	HIIT: 17 MICT: 17 Nutrition: 19	12.4 ± 1.9	11.9 ± 2.4	11.8 ± 2.4	2.24 ± 0.58	2.43 ± 0.68	2.28 ± 0.66	2.55 ± 0.59	2.28 ± 0.60	2.30 ± 0.65	31.2 ± 5.9	32.2 ± 5.23	31.6 ± 5.5	36.6 ± 7.4	33.6 ± 6.3	32.2 ± 5.9	28.8 ± 3.8	30.4 ± 5.0	29.1 ± 4.8	28.1 ± 3.6	29.1 ± 4.8	28.7 ± 4.7	44.7 ± 7.3	43.8 ± 5.4	43.8 ± 6.1	43.4 ± 7.1	42.6 ± 6.0	42.9 ± 6.5	31.9 ± 10.9	30.9 ± 10.5	31.1 ± 10.9	31.0 ± 8.6	30.2 ± 10.7	29.8 ± 10.3	38.6 ± 9.1	39.2 ± 11.1
								HIIT : 4sets x 4min (16 min) Rest between: 3 min (x3) Total: 40min (+ Warm up 10min, + cool 5 min 3x/ weeks
			No	Studies	Country	Design	Intervention	Intervention HIIT (durasi)	Invention HIIT (type) : running / cycling / dll	Patients	per group	Follow-up	Gender		Mean Age			Height (cm)						Body Weight (kg) ✅						BMI ✅						Body fat (%) ✅						Muscle mass						Waist (cm)
																		Basaline			After			Basaline			After			Basaline			After			Basaline			After			Basaline			After			Basaline
													Male	Female	control	HIIT	supra HIIT	control	HIIT	supra HIIT	control	HIIT	supra HIIT	control	HIIT	supra HIIT	control	HIIT	supra HIIT	control	HIIT	supra HIIT	control	HIIT	supra HIIT	control	HIIT	supra HIIT	control	HIIT	supra HIIT	control	HIIT	supra HIIT	control	HIIT	supra HIIT	control	HIIT
			3	Chuensiri et al	Thailand	RCT	sedentary control, HIIT, supra-HIIT	HIIT = 8 set of 2 minute exercises (16 min), 1 minute rest (x7) --> total HIIT 23 min Training program: 45-60 min (3x1 minggu - smpe 12 minggu)	cycling on mechanically braked cycle ergometer	37	2015-11-11	12 weeks			10.6 ± 0.3	11.0 ± 0.3	11.1 ±0.2	144 ± 3	155 ± 3	155 ± 3	146 ± 3	157 ± 3	157 ± 2	53.6 ± 4.0	58.6 ± 4.0	64.4 ± 3.4	54.3 ± 3.9	59.7 ± 3.9	64.8 ± 3.4	26.1 ± 1.0	24.2 ± 1.0	26.5 ± 0.9	25.1 ± 1.1	24.1 ± 1.1	26.1 ± 0.9	25.3 ± 1.6	22.9 ± 1.6	26.2 ± 1.3	24.4 ± 1.6	21.5 ± 1.6	24.8 ± 1.4	36.6 ± 2.1	41.5 ± 2.1	43.2 ± 1.8	37.8 ± 2.1	43.1 ± 2.1	44.5 ± 1.8	83.6 ± 2.8	86.1 ± 2.8
								supra-HIIT = 8 set 20 detik - rest 10 detik
			No	Studies	Country	Design	Intervention	Intervention HIIT (durasi)	Invention HIIT (type) : running / cycling / dll	Patients	per group	Follow-up	Gender		Mean Age			Body mass (kg) ✅						BMI (kg/m2) ✅						Body fat (%)✅						WC (cm)						MAS (km/h)						10 m sprint
																		Basaline			After			Basaline			After			Basaline			After			Basaline			After			Basaline			After			Basaline
													Male	Female	Control	MIIT	HIIT	Control	MIIT	HIIT	Control	MIIT	HIIT	Control	MIIT	HIIT	Control	MIIT	HIIT	Control	MIIT	HIIT	Control	MIIT	HIIT	Control	MIIT	HIIT	Control	MIIT	HIIT	Control	MIIT	HIIT	Control	MIIT	HIIT	Control	MIIT
			4	Abrassi et al	Tunisia	RCT	HIIT, MIIT, control	12 weeks = 3 weeks from the start of the program, the number of repetitions increased from 6 to 8. After the 6th week, the intensity was increased by 5% every 3 weeks. 2 sets x 6 (30s exercise /30s rest) Total: 41 min Warm up (10 min), Main exercise (12 min), Rest between sets (4 min), cool down + stretching (15 min) 3x/ weeks	warm up, main stimuli, cool down On the first day, squat jump (SJ), vertical countermovement jump (CMJ), and 30-m sprint time (with 10- and 20-m splits) were assessed. On the second day, standing long jump (SLJ), med-icine ball throw (MBT), and agility (t-test) tests were performed. Repeated-sprint ability (RSA) and five jumps (FJT) tests were administered on the third day. The Spartacus test was…	43	12/13/13	12 weeks			15 - 18 thn			83.3 ± 10.3	83.1 ± 11.1	84.0 ± 10.7	84.1 ± 9.40	81.9 ± 11.5	78.3 ± 11.6	33.2 ± 5.70	33.1 ± 5.62	32.6 ± 3.61	33.3 ± 4.32	32.5 ± 5.51	30.2 ± 3.32	33.0 ± 3.09	33.8 ± 2.94	33.7 ± 3.44	33.5 ± 3.20	32.9 ± 2.93	32.1 ± 3.42	100±8.05	105±10.8	105±9.00	101±6.99	102±9.43	101±8.51	11.0 ±0.73	11.0 ±0.91	10.1±1.32	10.9±0.90	11.8±0.92	11.9±1.60	2.50±0.07	2.51±0.22
			No	Studies	Country	Design	Intervention	Intervention HIIT (durasi)	Invention HIIT (type) : running / cycling / dll	Patients	per group	Follow-up	Gender		Mean Age		Weight (kg)✅				BMI extended z score				Body fat (%) ✅				LBM (kg)				visceral fat area				IHTG (%)				CAP score (dB/m)				LSM score (kPa)				VO2 peak (mL/min/kg per LBM)
																	Basalline		week 4		Basalline		week 4		Basalline		week 4		Basalline		week 4		Basalline		week 4		Basalline		week 4		Basalline		week 4		Basalline		week 4		Basalline
													Male	Female	exercise	control	exercise	control	exercise	control	exercise	control	exercise	control	exercise	control	exercise	control	exercise	control	exercise	control	exercise	control	exercise	control	exercise	control	exercise	control	exercise	control	exercise	control	exercise	control	exercise	control	exercise
			5	Tas et al	USA	RCT	exercise , control	3x 1 minggu slm 4 minggu (12 sesi) HIIT: 10 x 1 min (10 min) Rest between: 2 min Total: 45 min (5-10 min warm up + (exercise + rest) + cool down 5-10 min)	exercise equipment (elliptical machine, bike, or treadmill) aerobic exercise	40	34/6	Week-4	EG: 14 CG: 2	EG: 20 CG: 4	13-18 thn		101.18	90.85	101.34	91.64	3.17	2.39	3.14	2.42	45.35	44.14	45.19	44.05	52.02	48.39	52.04	48.62	95.78	72.99	95.85	82.06	5.26	8.97	4.96	3.96	279.18	280.83	251.57c	264.67	5.3	5.19	5.56	6.41	40.36
								Each HIIT session lasted approximately 45 min and included a 5- to 10-min low-intensity warm-up followed by 10 1-min intervals using exercise equipment (elliptical machine, bike, or treadmill) . Participants had 2 min of recovery time (walking) between each effort. Participants performed a 5- to 10-min cool-down at a low intensity to finish the session
			No	Studies	Country	Design	Intervention	Intervention HIIT (durasi)	Invention HIIT (type) : running / cycling / dll	Patients	per group	Follow-up	Gender		Mean Age			BMI			Body height						Body Mass ✅						Body Mass Index ✅						Body fat mass (%)✅						Body fat mass (kg)
																					Basaline			After			Basaline			After			Basaline			After			Basaline			After			Basaline			After
													Male	Female	Football	HIIT	Control	Football	HIIT	Control	Football	HIIT	Control	Football	HIIT	Control	Football	HIIT	Control	Football	HIIT	Control	Football	HIIT	Control	Football	HIIT	Control	Football	HIIT	Control	Football	HIIT	Control	Football	HIIT	Control	Football	HIIT
			6	Cvetković et al., (2018)	Serbia	RCT	Football HIIT Control group	0-4 weeks: 3 sets x 5 (repitition) 10s/10s HIIT : 5 min 5-8 weeks: 3 sets x 8 (repetition) 15s/15s HIIT: 12 min 9-12 weeks: 3 sets x 10 (repetition) 20s/20s HIIT: 20min The distance for every participant was individually calculated by multiplying the achieved 100% MAS and work interval duration to obtain the same training intensity in every participant (eg, distance run = 3.5 m/s × 10 seconds = 3…	The HIIT program consisted of three sets of high-intensity interval runs separated by 3 minutes of passive rest	35	10 / 11 / 14	week-12			11-13 years old			25.4 ± 4.1	26.6 ± 3.4	25.3 ± 4.8	157.90 ± 5.80	163.82 ± 9.36	162.68 ± 9.29	159.20 ± 5.72	164.60 ± 9.09	164.57 ± 8.42	63.70 ± 12.61	71.49 ± 10.52	67.35 ± 16.07	62.81 ± 13.06	71.53 ± 11.23	71.18 ± 15.28	25.43 ± 4.05	26.62 ± 3.36	25.29 ± 4.77	24.65 ± 4.22	26.35 ± 3.33	26.16 ± 4.49	36.25 ± 6.70	32.85 ± 8.29	29.94 ± 8.41	33.47 ± 6.99	31.15 ± 6.90	29.60 ± 7.68	23.54 ± 7.96	23.51 ± 7.09	20.68 ± 10.84	21.60 ± 8.47	22.36 ± 6.41
																					Raw diff (95% CI) football		Raw diff (95% CI) HIIT		Raw diff (95% CI) Control		Raw diff (95% CI) football		Raw diff (95% CI) HIIT		Raw diff (95% CI) Control		Raw diff (95% CI) football		Raw diff (95% CI) HIIT		Raw diff (95% CI) Control		Raw diff (95% CI) football		Raw diff (95% CI) HIIT		Raw diff (95% CI) Control		Raw diff (95% CI) football		Raw diff (95% CI) HIIT		Raw diff (95% CI) Control
																					1.30 (0.69, 1.91)		0.78 (−1.38, 2.94)		1.89 (−0.25, 4.03)		−0.89 (−2.34, 0.56)		0.04 (−1.50, 1.58)		3.83 (−0.03, 7.70)		−0.78 (−1.30, −0.26)		-0.26 (-1.11,058)		0.87 (−0.12, 1.85)		−2.78 (−4.22, −1.34)		-1.70 (-4.78, 1.38)		-0.33 (-1.45, 0.78)		−1.94 (−3.25, −0.63)		-1.15 (-3.58, 1.29)		0.87 (−0.71, 2.44)
			No	Studies	Country	Design	Intervention	Intervention HIIT (durasi)	Invention HIIT (type) : running / cycling / dll	Patients	per group	Follow-up	Gender		Mean Age			Mean Height (m)			Mean Weight			Mean BMI			Congruent reaction time (s)						Neutral reaction time (s)						Incongruent reaction time (s)						Congruent number of errors (n)
																											Basaline			After			Basaline			After			Basaline			After			Basaline			After
													Male	Female	HIIE	HICE	Control	HIIE	HICE	Control	HIIE	HICE	Control	HIIE	HICE	Control	HIIE	HICE	Control	HIIE	HICE	Control	HIIE	HICE	Control	HIIE	HICE	Control	HIIE	HICE	Control	HIIE	HICE	Control	HIIE	HICE	Control	HIIE	HICE
			7	Zhang et al. (2022)	China	RCT	HIIE HICE Control	the HIIE group completed a single bout of 30-min treadmill exer- cise session, which included 5 min of 60–70% maximal heart rate (HRmax = 220 − age) [42] warm up, 8 × 2 min of 85–95% HRmax, interspersed with 1 min of relaxation (20 min in total), and 5 min of cool-down HIIT: 8 x 2min (16 min) Rest between: 1 min (Rest 4x doang) The HICE group performed 30 min of rope skipping, control (CON) group…	Treadmill	72	24/24/24	Post			11.58 ± 1.14	11.71 ± 1.16	11.38 ± 0.77	1.46 ± 0.06	1.45 ± 0.08	1.45 ± 0.05	55.24 ± 6.29	55.90 ± 8.32	54.21 ± 4.65	25.88 ± 1.12	26.31 ± 1.21	25.88 ± 0.73	25.60 ± 7.06	24.33 ± 5.71	24.35 ± 5.13	24.52 ± 7.17	22.29 ± 5.95	23.91 ± 4.97	33.53 ± 11.51	30.50 ± 8.62	32.33 ± 8.08	31.34 ± 10.37	27.96 ± 7.61	31.89 ± 7.44	40.58 ± 9.05	40.17 ± 7.63	39.57 ± 6.03	38.78 ± 8.68	39.18 ± 7.71	39.17 ± 5.70	1.04 ± 0.91	0.79 ± 0.78	0.79 ± 0.78	0.67 ± 0.72	0.58 ± 0.78
			No	Studies	Country	Design	Intervention	Intervention HIIT (durasi)	Invention HIIT (type) : running / cycling / dll	Patients	per group	Follow-up	Gender		Mean Age		Weight (kg)✅				BMI ✅				Body fat (%) ✅				Fat mass ✅ (kg)				lean body mass				CMJ (cm)				sprint ability				VO2 peak (mL/kg/min)				HR max (bpm)
																	Basalline		Post		Basalline		Post		Basalline		Post		Basalline		Post		Basalline		Post		Basalline		Post		Basalline		Post		Basalline		Post		Basalline
													Male	Female	HIIE	MICE	HIIE	MICE	HIIE	MICE	HIIE	MICE	HIIE	MICE	HIIE	MICE	HIIE	MICE	HIIE	MICE	HIIE	MICE	HIIE	MICE	HIIE	MICE	HIIE	MICE	HIIE	MICE	HIIE	MICE	HIIE	MICE	HIIE	MICE	HIIE	MICE	HIIE
			8	Zuo et al	China	RCT	HIIE MICE	8 weeks (3x / weeks) HIIE = 2 sets of 15x20s high intensiy run (85% MAS, about 80–85% HRmax) separated by 15 ×20s active recovery bouts at low-intensity (50% MAS, about 45–50% HRmax), with 5 min rest between the 2 sets while the total duration time was 25 min HIIT : 20 min Between sets : + 5min MICE = all children were encouraged to maintain the required run- ning speed and HR by checking speed a…	running	40	20/20	Weeks - 8			8.1 ±0.9	7.9 ±0.6	41.5 ±7.6	38.4 ±4.2	40.9 ±7.4*	38.5 ±4.2	21.6 ±1.8	21.6 ±1.4	21.0 ±1.7	21.4 ±1.1	21.8 ±5.9	19.3 ±5.5	21.1 ±5.1	18.9 ±5.2	9.1 ±3.7	8.3 ±2.3	8.4 ±3.4	8.1 ±2.3	29.9 ±3.0	28.1 ±3.6	30.1 ±3.2	28.2 ±3.5	21.2 ±2.3	21.5 ±2.7	23.0 ±2.5	22.8 ±3.0	10.8 ±0.9	10.6 ±1.3	10.4 ±0.7	10.4 ±1.2	28.9 ±2.7	29.1 ±2.6	32.3 ±3.2	30.2 ±3.1	202.9 ±5.5
			No	Studies	Country	Design	Intervention	Intervention HIIT (durasi)	Invention HIIT (type) : running / cycling / dll	Patients	per group	Follow-up	Gender		Mean Age			BMI (kg/m2) ✅						FM (%)						Lean mass (kg)						trunk FM (kg)						BP(kg)						SBP(kg)
																		Basaline			After			Basaline			After			Basaline			After			Basaline			After			Basaline			After			Basaline
													Male	Female	SIIT	HIIT	Control	SIIT	HIIT	Control	SIIT	HIIT	Control	SIIT	HIIT	Control	SIIT	HIIT	Control	SIIT	HIIT	Control	SIIT	HIIT	Control	SIIT	HIIT	Control	SIIT	HIIT	Control	SIIT	HIIT	Control	SIIT	HIIT	Control	SIIT	HIIT
			9	Galves et al., 2024 Effectiveness of high intensity and sprint interval training on metabolic biomarkers, body composition, and physical fitness in adolescents/ randomized controlled trial	spain	RCT	SIT HIIT Control	8 weeks, 2x / weeks, for 12 min per session (Exercise: 6 min) SIT group performed 6 sets of 60 s of work (90-95%HRmax) / 60 s of rest (50-55%HRmax) HIIT group performed 2 reps x 3 sets of 2 min of work (80-85%HRmax) / 2 min of rest (50-55%HRmax)	running	60	20/20/20	weeks - 8	ga tertulis	ga tertulis	12.51 ± 0.75			22.61 ± 1.25	20.65 ± 1.08	24.86 ± 1.30	22.32 ± 1.18	20.49 ± 1.02	24.68 ± ±1.23	27.11 ± 2.36	22.79 ± ±2.04	29.99 ± 2.46	24.67 ± 2.53	18.74 ± 2.19	29.31 ± 2.64	40.90 ± 2.43	38.11 ± 2.10	40.80 ± 2.54	42.08 ± 2.38	40.74 ± 2.06	41.56 ± 2.48	3.96 ± 0.86	3.13 ± 0.74	4.36 ± 0.90	3.38 ± 0.80	2.56 ± 0.69	4.18 ± 0.84	81.22 ± 3.70	94.15 ± 3.20	89.78 ± 3.70	79.94 ± 2.32	81.02 ± 2.01	86.47 ± 2.32	117.17 ± 5.19	130.06 ± 4.50
																		diff SIT		diff HIIT		diff Control		diff SIT		diff HIIT		diff Control		diff SIT		diff HIIT		diff Control		diff SIT		diff HIIT		diff Control		diff SIT		diff HIIT		diff Control		diff SIT
																		−0.29 ± 0.24		−0.18 ± 0.21		−0.20 ± 0.26		−2.42 ± 0.70		−3.82 ± 0.62		−1.03 ± 0.75		1.17 ± 0.43		2.52 ± 0.38		0.91 ± 0.46		−0.58 ± 0.17		−0.50 ± 0.15		−0.29 ± 0.18		−1.11 ± 4.13		−12.76 ± 3.59		−3.96 ± 4.17		0.06 ± 5.49
			No	Studies	Country	Design	Intervention	Intervention HIIT (durasi)	Invention HIIT (type) : running / cycling / dll	Patients	per group	Follow-up	Gender		Mean Age (18-22 years old)			body mass (kg)✅						% body fat (kg) ✅						whole body FM(kg)						android FM (kg)						gynoid FM (kg)						trunk FM (kg)
																		Basaline			After			Basaline			After			Basaline			After			Basaline			After			Basaline			After			Basaline
													Male	Female	HIIT	MICT	Control	HIIT	MICT	Control	HIIT	MICT	Control	HIIT	MICT	Control	HIIT	MICT	Control	HIIT	MICT	Control	HIIT	MICT	Control	HIIT	MICT	Control	HIIT	MICT	Control	HIIT	MICT	Control	HIIT	MICT	Control	HIIT	MICT
			10	Zhang et all (2017)	China	RCT	HIIT MICT Control	12 weeks MICT = continuousexercise on a cycle ergometer HIIT = repeated 4-minute cycling exercise bouts at an intensity folowed by a 3-minute passive recovery unti lhe targeted 300kJ of work was achieved. Exercise time * Week 1-4: 29.4 ± 3.4 * Week 4-8: 37.8 ± 4.6 * Week 8-12: 34.4 ± 3.8	Cycling	43	15/15/13	Week-12			21.5±1.7	20.9±1.4	20.8±1.1	67.3±6.1	68.5±8.0	67.5±9.2	64.0±6.0	65.1±7.7	67.6±9.2	38.1±2.3	38.0 ± 2.1	40.9 ± 2.9	35.6±2.0	35.6 ± 2.3	41.4 ± 3.0	25.7 ± 3.3	26.1 ± 3.7	27.8 ± 5.4	22.9 ± 3.1	23.3 ± 4.0	28.1 ± 5.1	2.0 ± 0.4	1.9 ± 0.3	2.2 ± 0.4	1.7 ± 0.4	1.6 ±0.3	2.2 ± 0.4	4.6 ± 0.5	4.8 ± 0.9	4.8 ± 1.1	4.1 ± 0.6	4.1 ± 0.8	4.9 ±1.0	11.7 ± 2.1	11.4 ± 2.1
			No	Studies	Country	Design	Intervention	Intervention HIIT (durasi)	Invention HIIT (type) : running / cycling / dll	Patients	per group	Follow-up	Gender		Mean Age				BMI ✅								WC								WHtR								BF (%)
																			Baseline				After				Baseline				After				Baseline				After				Baseline				After
													Male	Female	CG1	EG1	CG2	EG2	CG1	EG1	CG2	EG2	CG1	EG1	CG2	EG2	CG1	EG1	CG2	EG2	CG1	EG1	CG2	EG2	CG1	EG1	CG2	EG2	CG1	EG1	CG2	EG2	CG1	EG1	CG2	EG2	CG1	EG1	CG2
			11	Pedro Delgado - Floody et al., 2018	Chile	Pilot Study	CG1/ EG 1/ CG 2/ EG2	The overweight and obese schoolchildren carried out HIIT for 28 weeks. 56 sessions of 60 min each, twice per week (40 min of effective work). The exercises wherein 4–6 min rep- etitions were performed, followed by 1–2 min of recovery (four to five sets). The circuit (running, jumping, throwing) included a 1:1 ratio of activity to recovery: 30–60 s of activity and 30–60 s of recovery time (two to …	The circuit (running, jumping, throwing)	197	59/17/92/29	Week-28		CG1 : 9 EG1 : 32 EG2: 49 CG2: 18	8.39 ± 1.15 years)				20.11 ± 1.76	19.62 ± 1.33	23.71 ± 2.96	23.64 ± 2.73	19.83 ± 2.53	18.66 ± 1.66	24.31 ± 3.48	22.38 ± 2.98	61.72 ± 5.08	60.73 ± 4.38	70.97 ± 8.55	69.62 ± 11.57	63.22 ± 4.44	59.40 ± 8.24	71.31 ± 8.36	70.35 ± 7.16	0.48 ± 0.02	0.48 ± 0.03	0.56 ± 0.06	0.54 ± 0.14	0.48 ± 0.03	0.47 ± 0.06	0.55 ± 0.06	0.52 ± 0.04	21.57 ± 5.46	22.85 ± 4.13	26.79 ± 5.52	28.97 ± 4.93	23.48 ± 5.11	20.41 ± 4.06	28.74 ± 5.29
			No	Studies	Country	Design	Intervention	Intervention HIIT (durasi)	Invention HIIT (type) : running / cycling / dll	Patients	per group	Follow-up	Gender		Mean Age				BMI ✅								WC								WHtR								BF (%) ✅
																			Baseline				After				Baseline				After				Baseline				After				Baseline				After
													Male	Female	CG1	EG1	CG2	EG2	CG1	EG1	CG2	EG2	CG1	EG1	CG2	EG2	CG1	EG1	CG2	EG2	CG1	EG1	CG2	EG2	CG1	EG1	CG2	EG2	CG1	EG1	CG2	EG2	CG1	EG1	CG2	EG2	CG1	EG1	CG2
				Pedro Delgado - Floody et al., 2018	Chile	Pilot Study	CG1/ EG 1/ CG 2/ EG2	The overweight and obese schoolchildren carried out HIIT for 28 weeks. 56 sessions of 60 min each, twice per week (40 min of effective work). The exercises wherein 4–6 min rep- etitions were performed, followed by 1–2 min of recovery (four to five sets). The circuit (running, jumping, throwing) included a 1:1 ratio of activity to recovery: 30–60 s of activity and 30–60 s of recovery time (two to …	The circuit (running, jumping, throwing)	197	59/17/92/29	Week-28	CG1 : 8 EG1 : 27 EG2: 43 CG2: 11		8.39 ± 1.15 years)				19.33 ± 1.24	19.71 ± 2.03	22.35 ± 2.13	23.11 ± 2.31	18.86 ± 2.53	18.58 ± 2.04	22.59 ± 3.20	22.12 ± 3.01	59.00 ± 6.83	64.22 ± 6.85	67.64 ± 8.85	71.11 ± 9.72	63.19 ± 5.33	62.11 ± 7.34	70.37 ± 10.01	68.50 ± 10.31	0.47 ± 0.05	0.49 ± 0.03	0.52 ± 0.04	0.52 ± 0.13	0.49 ± 0.02	0.48 ± 0.04	0.53 ± 0.05	0.53 ± 0.07	16.80 ± 2.79	19.37 ± 4.73	23.56 ± 5.69	28.98 ± 15.66	17.59 ± 4.08	16.93 ± 4.26	24.20 ± 6.37
			No	Studies	Country	Design	Intervention	Intervention HIIT (durasi)	Invention HIIT (type) : running / cycling / dll	Patients	per group	Follow-up	Gender		Mean Age		Mean height		Weight ✅				BMI ✅				TLM				Trunk LM				Abdomen LM				Leg LM (kg)				TFM (kg)				Trunk FM (kg
																			basaline		After		basaline		After		basaline		After		basaline		After		basaline		After		basaline		After		basaline		After		basaline		After
													Male	Female	HIIT	MICT	HIIT	MICT	HIIT	MICT	HIIT	MICT	HIIT	MICT	HIIT	MICT	HIIT	MICT	HIIT	MICT	HIIT	MICT	HIIT	MICT	HIIT	MICT	HIIT	MICT	HIIT	MICT	HIIT	MICT	HIIT	MICT	HIIT	MICT	HIIT	MICT	HIIT
			12	Kong et al (2016)	Makau	RCT	HIIT MICT	4 days / week for 5 weeks HIIT = 60 repetitions of hight intensity interval exercise (8 s cycling and 12 s passive recovery) on a cycle ergometer 20 min HIIT: 8 min (60 reps) Rest: 12s (interval) MIIT = continuous cycling exercise on an ergocycle for 40 min	cycling	18	10/18	Week-5	ga tertulis	ga tertulis	19.8±0.8	19.9±2.1	163.5 ± 4.7	162.3 ± 5.4	68.3±8.9	69.1±8.8	69.0±8.9	68.2±7.8	25.5 ± 2.1	26.2 ± 2.4	25.7 ± 2.2	25.9 ± 2.2	41.4 ± 4.6	42.9 ± 4.9	41.4 ± 4.7	41.3 ± 4.9	18.1 ±2.4	18.1 ±3.3	18.2 ± 2.4	18.1 ± 2.2	8.0 ± 1.3	7.9 ± 1.3	8.0 ± 1.0	7.7 ± 1.0	16.4 ± 1.9	17.0 ± 2.1	16.4 ± 1.7	16.4 ± 2.0	25.3 ± 6.0	25.1 ± 4.9	26.0 ± 6.4	25.3 ± 4.0	12.8 ± 3.0	12.7 ± 2.9	13.1 ± 3.4
																			∆ intervention HIIT		∆ intervention MICT		∆ intervention HIIT		∆ intervention MICT		∆ intervention HIIT		∆ intervention MICT		∆ intervention HIIT		∆ intervention MICT		∆ intervention HIIT		∆ intervention MICT		∆ intervention HIIT		∆ intervention MICT		∆ intervention HIIT		∆ intervention MICT		∆ intervention HIIT		∆ intervention MICT
																			1.1±2.3		−1.1±2.5		1.1±2.3		−1.1±2.5		−0.2±2.0		−3.9±3.3		0.7±2.2		2.2±18.8		1.1 ± 6.3		-2.3 ± 6.5		-0.1 ± 3.5		-3.3 ± 3.0		2.8 ± 6.5		1.8 ± 7.0		1.7 ± 8.9		0.5 ±. 6.6
			No	Studies	Country	Design	Intervention	Intervention HIIT (durasi)	Invention HIIT (type) : running / cycling / dll	Patients	per group	Follow-up	Gender		Mean Age		BMI				Fat mass				Fat free mass				Body fat (%) ✅				Blood glucose (mmol l -1)				total cholesterol				HDL				LDL				TAG
																	Basaline		After		Basaline		After		Basaline		After		Basaline		After		Basaline		After		Basaline		After		Basaline		After		Basaline		After		Basaline
													Male	Female	Train (HIIT)	Control	Train (HIIT)	Control	Train (HIIT)	Control	Train (HIIT)	Control	Train (HIIT)	Control	Train (HIIT)	Control	Train (HIIT)	Control	Train (HIIT)	Control	Train (HIIT)	Control	Train (HIIT)	Control	Train (HIIT)	Control	Train (HIIT)	Control	Train (HIIT)	Control	Train (HIIT)	Control	Train (HIIT)	Control	Train (HIIT)	Control	Train (HIIT)	Control	Train (HIIT)
			13	Kranen et all (2022)	UK	RCT	training (HIIT) control	HIIT = 4 weeks of running with three session per week week 1 + 2 = 8x1 min running intervals interspersed with 75 s of passive rest week 3 = 10x1 min running intervals interspersed with 75 s of passive rest week 4 = 12 x 1 min running intervals interspersed with 75 s of passive rest	running	19	2025-09-10	Week - 4			13.3 ± 0.5		17.4 ±0.9	18.6 ±2.5	17.2 ±0.9	18.2 ±2.3	7.8 ±3.1	11.0 ± 4.7	8.3 ± 3.1	11.1 ± 5.2	36.5 ± 7.0	39.1 ± 6.8	36.7 ± 5.8	39.2 ± 7.9	18.0 ± 7.3	21.6 ± 7.5	18.4 ± 6.2	21.9 ± 9.1	5.74 ± 0.32	5.69 ± 0.70	6.26 ± 1.00	6/06 ± 0.42	3.60 ± 0.55	3.24 ± 0.50	3.36 ± 0.35	3.25 ± 0.58	1.35 ± 0.20	1.31 ± 0.36	1.18 ± 0.20	1.09 ± 0.38	2.08 ± 0.50	1.98 ± 0.58	2.06 ± 0.26	1.94 ± 0.62	0.84 ± 0.31
			No	Studies	Country	Design	Intervention	Intervention HIIT (durasi)	Invention HIIT (type) : running / cycling / dll	Patients	per group	Follow-up	Gender		Mean Age			BMI ✅						FM (%)						Lean Mass (kg)						Trunk FM						BP						SBP
																		Basaline			After			Basaline			After			Basaline			After			Basaline			After			Basaline			After			Basaline
													Male	Female	SIT	HIIT	CON	SIT	HIIT	Control	SIT	HIIT	Control	SIT	HIIT	Control	SIT	HIIT	Control	SIT	HIIT	Control	SIT	HIIT	Control	SIT	HIIT	Control	SIT	HIIT	Control	SIT	HIIT	Control	SIT	HIIT	Control	SIT	HIIT
			14	Galvez et al., 2024	Spain	RCT	SIT HIIT Control	SIT as an effort of short duration (≤60 s) with a maximum intensity, and HIIT as a longer effort (>60s up to 5min) and an intensity close to the maximum SIT: 60s (6 sets | 12 min) 8 weeks 60s/60s HIIT: 120s (3 sets | 12 min) 8 weeks 120s/120s	Running	32	2012-11-09	8 week	SIT: 6 HIIT: 6 CON: 6	SIT: 3 HIIT: 5 CON: 6	12.51 ± 0.75 years old			25.1 ± 1.1	22.9 ± 1.0	26.3 ± 1.1	24.7 ± 1.0	22.7 ± 1.0	25.9 ± 1.0	29.2 ± 2.3	26.5 ± 2.2	31.9 ± 2.3	26.7 ± 2.6	24.3 ± 2.4	31.0 ± 2.6	46.0 ± 2.8	40.2 ± 2.7	42.4 ± 2.8	46.7 ± 2.7	42.0 ± 2.6	43.0 ± 2.7	5.3 ± 1.0	4.0 ± 0.9	5.1 ± 1.0	4.5 ± 0.9	3.4 ± 0.9	4.9 ± 0.9	80.9 ± 5.2	95.1 ± 4.7	89.8 ± 5.2	81.9 ± 2.3	82.0 ± 2.1	87.1 ± 2.3	119.9 ± 6.8	128.1 ± 6.1
																		diff SIT		diff HIIT		diff Control		diff SIT		diff HIIT		diff Control		diff SIT		diff HIIT		diff Control		diff SIT		diff HIIT		diff Control		diff SIT		diff HIIT		diff Control		diff SIT
																		−0.5 ± 0.3		−0.2 ± 0.3		−0.4 ± 0.3		−2.2 ± 0.7		−2.2 ± 0.7		−1.1 ± 0.7		0.6 ± 0.5		1.8 ± 0.5		0.7 ± 1.0		−0.8 ± 0.2		−0.6 ± 0.2		−0.3 ± 0.2		03.1 ± 5.7		−13.4 ± 5.0		−4.2 ± 5.7		6.3 ± 6.7
			No	Studies	Country	Design	Intervention	Intervention HIIT (durasi)	Invention HIIT (type) : running / cycling / dll	Patients	per group	Follow-up	Gender		Mean Age			Weight (kg)✅						Height (m)						Abdominal Circumference (cm)						BMI ✅						Fat Mass (kg)						Body Fat Mass (%)✅
																		Basaline			After			Basaline			After			Basaline			After			Basaline			After			Basaline			After			Basaline
													Male	Female	HIIT + L-CIT	HIIT + PLACEBO	L-CIT	HIIT + L-CIT	HIIT + PLACEBO	L-CIT	HIIT + L-CIT	HIIT + PLACEBO	L-CIT	HIIT + L-CIT	HIIT + PLACEBO	L-CIT	HIIT + L-CIT	HIIT + PLACEBO	L-CIT	HIIT + L-CIT	HIIT + PLACEBO	L-CIT	HIIT + L-CIT	HIIT + PLACEBO	L-CIT	HIIT + L-CIT	HIIT + PLACEBO	L-CIT	HIIT + L-CIT	HIIT + PLACEBO	L-CIT	HIIT + L-CIT	HIIT + PLACEBO	L-CIT	HIIT + L-CIT	HIIT + PLACEBO	L-CIT	HIIT + L-CIT	HIIT + PLACEBO
			15	Rodríguez-Carrillo et al., 2025	Mexico	RCT	HIIT + L-CIT HIIT + PLACEBO L-CIT	training on a stationary bike 3 times a week (Monday, Wednesday, and Friday) for 12 weeks. Training Protocol Weeks 1–2: 6 sets of 6 min intense work + 6 min recovery Weeks 3–4: 8 sets of 8 min intense work + 8 min recovery Weeks 5–12: 10 sets of 10 min intense work + 10 min recovery Supplementation L-citrulline group: Took 6.6 g/day (5 capsules in the morning, 4 in the evening) Placebo group: Too…	Cycling	33	15/14/14	week-12	HIIT + L-cit: 2 HIIT + Placebo: 2 L-cit: 6	HIIT + L-CIT: 9 HIIT + Placebo: 12 L-cit: 6	16 ± 0.89	16.10 ± 0.88	16.25 ± 0.75	86.3 ± 9.9	89.9 ± 15.9	92.2 ± 15.7	85.3 ± 10.2	89.5 ± 15.3	92.4 ± 15	1.6 ± 0.1	1.6 (1.49 - 1.92)	1.7 ± 0.1	1.6 ± 0.1	1.6 (1.49 - 1.92)	1.7 ± 0.1	101 ± 6.3	106 ± 11.1	107 ± 12.4	102 ± 6.7	105 ± 8.5	108 ± 11.7	32.6 ± 2.2	33.6 ± 3.9	34.6 ± 5.5	32.2 ± 2.4	33.4 ± 3.4	34.8 ± 5.5	37.8 ± 3.8	40.8 ± 9.6	41.9 ± 10.8	36 ± 4	39.9 ± 8.2	41.7 ± 10.7	43.9 ± 3.4	45.4 ± 6.32
																		∆ HIIT + L-Cit		∆ HIIT + Placebo		∆ L-CIT		∆ HIIT + L-Cit		∆ HIIT + Placebo		∆ L-CIT		∆ HIIT + L-Cit		∆ HIIT + Placebo		∆ L-CIT		∆ HIIT + L-Cit		∆ HIIT + Placebo		∆ L-CIT		∆ HIIT + L-Cit		∆ HIIT + Placebo		∆ L-CIT		∆ HIIT + L-Cit
																		−1.1 ± 1.7		−0.4 ± 0.9		0.2 ± 1.3		−1.1 ± 1.7		−0.4 ± 0.9		0.2 ± 1.3		−0.5 ± 3.8		−0.8 ± 5.2		0.4 ± 4.6		−0.5 ± 0.6		−0.8 ± 5.2		0.2 ± 0.4		−1.8 ± 2.2		−0.9 ± 3.8		−0.2 ± 2.1		−1.6 ± 1.9
			No	Studies	Country	Design	Intervention	Intervention HIIT (durasi)	Invention HIIT (type) : running / cycling / dll	Patients	per group	Follow-up	Gender		Mean Age		BMI ✅				WC (cm)				WHtR				Body fat				∑ 4 skinfold fat				SBP				DBP				RHR
																	Basaline		After		Basaline		After		Basaline		After		Basaline		After		Basaline		After		Basaline		After		Basaline		After		Basaline		After
													Male	Female	HIIT	Control	HIIT	Control	HIIT	Control	HIIT	Control	HIIT	Control	HIIT	Control	HIIT	Control	HIIT	Control	HIIT	Control	HIIT	Control	HIIT	Control	HIIT	Control	HIIT	Control	HIIT	Control	HIIT	Control	HIIT	Control	HIIT	Control
			16	Silva et al (2022)	Chile	RCT	HIIT control	28 weeks (2 session per week) HIIT = 56 session each session lasting 40-59 min HIIT: 30-40min	warming up - chese games - joint mobility exercises - calm down	443	295/148	week - 28	g disebutin	g disebutin	6.40 ± 0.64	6.31 ± 0.67	20.29 (2.81)	16.20 (0.86)	19.62 (2.75)	16.21 (1.26)	62.08 (5.48)	54.29 (2.78)	61.78 (6.56)	55.56 (4.34)	0.50 (0.03)	0.45 (0.02)	0.48 (0.04)	0.48 (0.30)	22.02 (5.54)	15.08 (3.46)	20.61 (5.47)	15.20 (3.55)	49.05 (16.18)	28.15 (7.12)	44.98 (16.50)	28.65 (8.25)	101.28 (11.43)	95.85 (11.01)	102.06 (14.87)	98.78 (11.44)	60.85 (10.65)	59.70 (12.09)	60.45 (13.59)	59.72 (13.30)	86.54 (12.58)	84.10 (12.31)	85.20 (11.37)	84.24 (12.25)
			No	Studies	Country	Design	Intervention	Intervention HIIT (durasi)	Invention HIIT (type) : running / cycling / dll	Patients	per group	Follow-up	Gender		Mean Age		VO2 peak (mL/kg/min)				Weight✅				BMI ✅				baPWV (m/s)				FMD (%)				Mean height		Mean HR
																	basaline		After		basaline		After		basaline		After		basaline		After		basaline		After
													Male	Female	MICT	HIIT	MICT	HIIT	MICT	HIIT	MICT	HIIT	MICT	HIIT	MICT	HIIT	MICT	HIIT	MICT	HIIT	MICT	HIIT	MICT	HIIT	MICT	HIIT	MICT	HIIT	MICT	HIIT
			17	Su et al (2024)	China	RCT	HIIT MICT	8 week HIIT = 5 min warm up + cool down and 10 1 min intervals at high intensity interspresed with 10 2 min interval at moderate exercise Total HIIT duration: 20 min MICT = 5 min warm up and 5 min cool down witth 35 min moderate exercise in between	running	44	22/22	week - 8			14 ±1	15 ± 1	32.52 ± 6.60	33.84 ± 5.45	36.01 ± 6.89	38.26 ± 5.62	78.33 ± 7.44	84.20 ± 8.06	76.80 ± 7.50	82.29 ± 8.08	31.1 ± 1.2	32.1 ± 1.2	30.1 ± 1.3	31.0 ± 1.3	878.18 ± 105.32	909.09 ± 111.95	853.59 ± 95.11	882.62 ± 92.81	7.05 ± 0.81	7.14 ± 0.96	7.31 ± 0.91	8.28 ± 1.08	1.59 ± 0.07	1.62 ± 0.08	77.5	78
			No	Studies	Country	Design	Intervention	Intervention HIIT (durasi)	Invention HIIT (type) : running / cycling / dll	Patients	per group	Follow-up	Gender		Mean Age		Weight (kg)				Height (cm)				BMI (kg/m2) ✅				BF (%)✅				BM (%)				Energy				Protein				Carbohydrate (gr)				Fat (gr)
																	basaline		After		basaline		After		basaline		After		basaline		After		basaline		After		basaline		After		basaline		After		basaline		After		basaline
													Male	Female	Intervention	Control	Control	Intervention	Control	Intervention	Control	Intervention	Control	Intervention	Control	Intervention	Control	Intervention	Control	Intervention	Control	Intervention	Control	Intervention	Control	Intervention	Control	Intervention	Control	Intervention	Control	Intervention	Control	Intervention	Control	Intervention	Control	Intervention	Control
			18	Javaheri et al., 2025	Iran	RCT (Pragmatic Trial)		Diet + HIIT high-intensity interval training (HIIT) program (three 90-minute sessions a week for 16 weeks). Recent studies reported that HIIT may contribute to weight loss and improve body composition 90 min = 10-minute warm up , 4-5 min rest (ga dikasih tau yang mana) 3x / week	Running	126		16 weeks			14.02±0.96	13.79±0.86	74.44 ± 11.83	74.45 ± 14.46	77.06 ± 12.27	73.58 ± 14.21	168.76 ± 8.11	165.75 ± 8.58	169.03 ± 8.85	166.95 ± 9.29	26.05 ± 2.96	26.73 ± 4.18	26.56 ± 2.89	26.41 ± 4.21	27.08 ± 6.19	28.24 ± 6.55	26.43 ± 5.87	26.43 ± 7.21	35.32 ± 2.59	34.82 ± 2.67	35.47 ± 2.43	35.47 ± 3.37	2550 ± 701	2925 ± 889	2634 ± 917	2350 ± 861	97.17 ± 28	162.34 ± 59	106.81 ± 42	158.98 ± 46	197.15 + 28	264.43 ± 33	286.97 ± 47	255.68 ± 41	203.35 ± 91
																	∆ (control) - mean		∆ (Intervention) - mean		∆ (control) - mean		∆ (Intervention) - mean		∆ (control) - mean		∆ (Intervention) - mean		∆ (control) - mean		∆ (Intervention) - mean		∆ (control) - mean		∆ (Intervention) - mean
																	2.62		-0.87		0.27		1.2		0.51		-0.32		-0.65		-1.81		0.42		0.65
			No	Studies	Country	Design	Intervention	Intervention HIIT (durasi)	Invention HIIT (type) : running / cycling / dll	Patients	per group	Follow-up	Gender		Mean Age		Mean Body mass (kg)		Mean height (kg)		Mean BMI		MAP				VO2 peak (L.min-1)				VO2 peak/kg				VO2 peak/LBM				Glucose				Insulin				HOMA-IR
																							basaline		After		basaline		After		basaline		After		basaline		After		basaline		After		basaline		After		basaline		After
													Male	Female	SIT	Control	SIT	Control	SIT	Control	SIT	Control	SIT	Control	SIT	Control	SIT	Control	SIT	Control	SIT	Control	SIT	Control	SIT	Control	SIT	Control	SIT	Control	SIT	Control	SIT	Control	SIT	Control	SIT	Control	SIT
			19	Salus et al (2022)	Estonia	RCT	SIT control	12 week SIT = 12 week sprint interval training program (3 sesi/week) on an electronically braked cycle ergometer) , 10 min warm up followed by 4-6 repetitions of 30 s (3min) all out cycling bouts interspersed with 4 min active rest after each bout	cycling	28	14/14	Week - 12			13.1 ± 1.3	13.7 ± 1.6	89.1 ± 15.9	99.3 ± 23.9	170.6 ± 10.0	173.5 ± 10.8	30.3 ± 3.2	32.6 ± 5.9	91.7 ± 3.1	93.4 ± 3.7	89.5 ± 2.9	92.5 ± 2.9	2.6 ± 0.2	2.7 ± 0.2	2.9 ± 0.2	2.8 ± 0.2	29.7 ± 1.4	27.6 ± 1.6	33.0 ± 1.2	28.0 ± 1.3	53.9 ± 2.1	48.8 ± 1.8	57.5 ± 1.3	48.1 ± 1.1	5.19 ± 0.1	5.24 ± 0.1	5.11 ± 0.1	5.19 ± 0.1	20.91 ± 1.7	34.41 ± 5.0	20.64 ± 1.8	31.80 ± 6.6	4.85 ± 0.4	8.11 ± 1.2	4.72 ± 0.4
			No	Studies	Country	Design	Intervention	Intervention HIIT (durasi)	Invention HIIT (type) : running / cycling / dll	Patients	per group	Follow-up	Gender		Mean Age		Height (cm)				Body mass (kg) ✅				BMI ✅
																	basaline		After		basaline		After		basaline		After
													Male	Female	SIT	Control	SIT	Control	SIT	Control	SIT	Control	SIT	Control	SIT	Control	SIT	Control
			20	Salus et al (2023)	Estonia	RCT	SIT control	12 week SIT = 4-6 x 30 s (180s = 3 min) sprints on an electronically braked cycle ergometer , warm up 10 min, 5 min cycling	cycling	28	14/14	week - 12			13.4 ± 0.3	13.7 ± 0.4	170.6 ± 2.7	173.5 ± 2.9	172.7 ± 2.6	174.8 ± 2.8	89.1 ± 4.3	99.3 ± 6.4	90.3 ± 4.1	102.0 ± 6.5	30.3 ± 0.9	32.6 ± 1.6	30.0 ± 0.9	33.0 ± 1.6
			No	Studies	Country	Design	Intervention	Intervention HIIT (durasi)	Invention HIIT (type) : running / cycling / dll	Patients	per group	Follow-up	Gender		Mean Age		Mean Height		Body mass (kg) ✅				BMI ✅				BF				FM				FFM				VAT				VO2 max				HR max
																			basaline		After		basaline		After		basaline		After		basaline		After		basaline		After		basaline		After		basaline		After		basaline		After
													Male	Female	Intervention	Control	Intervention	Control	Intervention	Control	Intervention	Control	Intervention	Control	Intervention	Control	Intervention	Control	Intervention	Control	Intervention	Control	Intervention	Control	Intervention	Control	Intervention	Control	Intervention	Control	Intervention	Control	Intervention	Control	Intervention	Control	Intervention	Control	Intervention
			21	Meng et al (2022)	China	RCT	Intervention control	12 week intervention = 12 week HIIT = 3 sesi / week. each session = 18 min of training Warm-up (10 min): * 5 min of moderate-intensity jogging (40–60% HRmax) * 5 min of dynamic stretching + 5 × 20m sprints HIIT Training (18 min): * Three sets of 8 × 15s high-intensity running (100% MAS, 80–90% HRmax) * Each sprint followed by 15s active recovery (50% MAS) * 3-min rest between sets *Total exercise…	running	40	20/20	week - 12			11.2 ± 0.7	10.9 ± 0.4	1.53 ± 0.08	1.51 ± 0.05	55.9 ± 6.9	53.3 ± 4.0	52.5 ± 6.2	53.6 ± 4.3	23.4 ± 1.6	23.8 ± 1.5	21.7 ± 1.5	23.5 ± 1.7	44.2 ± 8.1	43.6 ± 7.2	40.1 ± 7.8	44.0 ± 7.5	24.8 ± 6.0	23.3 ± 4.6	21.2 ± 5.1	23.7 ± 5.0	21.3 ± 5.0	21.2 ± 2.9	21.3 ± 5.3	21.8 ± 3.1	106.2 ± 30.6	97.8 ± 27.5	83.8 ± 24.6	102.7 ± 26.6	39.3 ± 3.1	37.8 ± 3.2	43.8 ± 2.4	39.6 ± 3.2	201.4 ± 5.2	200.3 ± 3.5	198.4 ± 5.3
			No	Studies	Country	Design	Intervention	Intervention HIIT (durasi)	Invention HIIT (type) : running / cycling / dll	Patients	per group	Follow-up	Gender		Mean Age
																		BMI (kg/m2) ✅			Fat mass (%) ✅			FFM (Kg) ✅			VO2peak (ml/kg.min) ✅			VO2peak (L/min)			Glucose ✅			Insulin (uUI/ml) ✅			HOMA-IR ✅			Total Cholestrol ✅			HDL-C ✅			TAG ✅
													Male	Female	HIIT	MICT	CG	HIIT	MICT	CG	HIIT	MICT	CG	HIIT	MICT	CG	HIIT	MICT	CG	HIIT	MICT	CG	HIIT	MICT	CG	HIIT	MICT	CG	HIIT	MICT	CG	HIIT	MICT	CG	HIIT	MICT	CG	HIIT	MICT
			22	Leite et al	Brazil	RCT	HIIT MICT CG	8 bouts (30s), 2 sets , recovery 60s rest between sets = 4 min 3x/ week Total exercise: 8 x 30s x 2 = 480s (8 min) he high-intensity interval training sessions consisted of 15 minutes of warm-up, 15-18 minutes of interval exercises, and 15 minutes of cool-down Week volume: 45-54 minutes HIIT and 90 minutes of warm- up and cold-down		56	20/20/16	week - 12			12.84±1.87	12.79±1.56	12.58±1.76	-1.565 ± 3.06	-0.035 ± 2.64	0.069 ± 2.50	-3.207 ± 5.13	-1.066 ± 4.42	2.189 ± 6.59	0.768 ± 8.615	1.391 ± 9.073	-1.336 ± 9.552	3.452 ± 4.94	3.214 ± 2.17	-0.226 ± 2.49	0.146 ± 0.68	0.251 ± 1.00	0.034 ± 0.93	-0.050 ± 8.70	3.150 ± 5.45	0.872 ± 5.20	0.196 ± 7.97	-1.175 ± 7.10	-0.881 ± 7.31	14.71 ± 3.3	17.73 ± 5.1	18.62 ± 4.8	-3.750 ± 26.40	-8.950 ± 27.61	-2.769 ± 25.93	5.600 ± 6.98	-3.050 ± 7.40	-3.542 ± 7.34	-38.600 ± 52.18	9.650 ± 28.35
									Bouts (physical exercise) MICT : Cycling / walking
[truncated: 166 more columns]

## Sheet: R1 BMI (1)
STUDY ID	Treatment 1	Treatment 2	Treatment 1 sample size	Treatment 2 Sample size	Treatment 1 Outcome	Treatment 2 Outcome	HIIT Treatment Type	Notes
Meng et al. (2022) Effect of	HIIT	Control (Non - Exercise)	12	13	22.7 ± 1.0	24.8 ± 1.0	Running	Male Only
Chuensiri et al. (2017)	HIIT	Control (Non - Exercise)	11	11	24.1 ± 1.1	25.1 ± 1.1	Cycling	Male Only
Abrassi et al. (2018)	HIIT	Control (Non - Exercise)	13	12	30.2 ± 3.32	33.3 ± 4.32	Sprinting, Agility (Jumping, Throwing)	Female Only
Galves et al., (2024) Effectiveness	HIIT	Control (Non - Exercise)	20	20	20.49 ± 1.02	24.68 ± ±1.23	Running	Both
Pedro Delgado - Floody et al., (2018)	HIIT	Control (Low intensity exercise)	27	8	18.58 ± 2.04	18.86 ± 2.53	Running, Agility (Jumping, Throwing)	Male Only
Pedro Delgado - Floody et al., (2018)	HIIT	Control (Low intensity exercise)	43	11	22.12 ± 3.01	22.59 ± 3.20	Running, Agility (Jumping, Throwing)	Male Only
Pedro Delgado - Floody et al., (2018)	HIIT	Control (Low intensity exercise)	32	9	18.66 ± 1.66	19.83 ± 2.53	Running, Agility (Jumping, Throwing)	Female Only
Pedro Delgado - Floody et al., (2018)	HIIT	Control (Low intensity exercise)	49	18	22.38 ± 2.98	24.31 ± 3.48	Running, Agility (Jumping, Throwing)	Female Only
Kranen et all (2022)	HIIT	Control (Non - Exercise)	10	9	17.2 ±0.9	18.2 ±2.3	Running	Male Only
Galvez et al., 2024	HIIT	Con (Non-exercise)	11	12	22.7 ± 1.0	25.9 ± 1.0	Running	Both
Javaheri et al., 2025	HIIT + Diet	Control (Non - Exercise )	53	43	26.41 ± 4.21	26.56 ± 2.89	Running	Male Only
Meng et al (2022)	HIIT	Control (Regular Physical Education)	20	20	21.7 ± 1.5	23.5 ± 1.7	Cycling	Male Only
Cvetković et al., (2018)	HIIT	Control	11	14	26.35 ± 3.33	26.16 ± 4.49	Running	Male Only
Su et al., (2024)	HIIT	MICT	22	22	31.0 ± 1.3	30.1 ± 1.3	Running	Male Only
Kong et al (2016)	HIIT	MICT	10	18	25.7 ± 2.2	25.9 ± 2.2	Cycling	Male Only
Meng et al. (2022) Effect of	HIIT	MICT	12	11	22.7 ± 1.0	23.2 ± 0.7	Running	Male Only
Dias et al. (2017)	HIIT	MICT	23	25	28.1 ± 3.6	29.1 ± 4.8	Running	Both
Zuo et al., (2023)	HIIT	MICT	20	20	21.0 ±1.7	21.4 ±1.1	Running	Male Only
Abrassi et al. (2018)	HIIT	MIIT	13	13	30.2 ± 3.32	32.5 ± 5.51	Sprinting, Agility (Jumping, Throwing)	Female Only
Rodríguez-Carrillo et al., (2025)	HIIT + Placebo	HIIT + L-Cit (Nutrition)	14	15	33.4 ± 3.4	32.2 ± 2.4	Cycling	Both
Rodríguez-Carrillo et al., (2025)	HIIT + Placebo	L-CIT	14	14	33.4 ± 3.4	34.8 ± 5.5	Cycling	Both
Dias et al. (2017)	HIIT	Nutrition	23	26	28.1 ± 3.6	28.7 ± 4.7	Running	Both
Chuensiri et al. (2017)	HIIT	Supra-HIIT (170%)	11	15	24.1 ± 1.1	26.1 ± 0.9	Cycling	Male Only
Galves et al., (2024) Effectiveness	HIIT	SIIT (Sprint 100%)	20	20	20.49 ± 1.02	22.32 ± 1.18	Running	Both
Galvez et al., 2024	HIIT	SIIT (Sprint 100%)	11	9	22.7 ± 1.0	24.7 ± 1.0	Running	Both
Cvetković et al., (2018)	HIIT	Football	11	10	26.35 ± 3.33	24.65 ± 4.22	Running	Male Only
(Diatas HIIT) vs Control
Salus et al (2023)	SIT	Control (Non - Exercise)	14	14	30.0 ± 0.9	33.0 ± 1.6	Cycling	Male Only
Chuensiri et al. (2017)	Supra-HIIT (170%)	Control (Non - Exercise)	15	11	26.1 ± 0.9	25.1 ± 1.1	Cycling	Male Only
Galves et al., (2024) Effectiveness	SIIT (Sprint 100%)	Control (Non - Exercise)	20	20	22.32 ± 1.18	24.68 ± ±1.23	Running	Both

## Sheet: R1 Weight (2)
STUDY ID	Treatment 1	Treatment 2	Treatment 1 sample size	Treatment 2 Sample size	Treatment 1 Outcome	Treatment 2 Outcome	HIIT Treatment Type	Notes
Dias et al. (2017)	HIIT	MICT	23	25	70.7 ± 12.9	72.8 ± 20.6	Running	Both
Su et al., (2024)	HIIT	MICT	22	22	82.29 ± 8.08	76.80 ± 7.50	Running	Male Only
Zuo et al., (2023)	HIIT	MICT	20	20	40.9 ±7.4	38.5 ±4.2	Running	Male Only
Kong et al (2016)	HIIT	MICT	10	18	69.0±8.9	68.2±7.8	Cycling	Male Only
Abrassi et al. (2018)	HIIT	MICT	13	13	78.3 ± 11.6	81.9 ± 11.5	Sprinting, Agility (Jumping, Throwing)	Female Only
Zhang et al., 2017	HIIT	MICT	15	15	64.0±6.0	65.1±7.7	Cycling	Female Only
Cvetković et al., (2018)	HIIT	Control	11	14	71.53 ± 11.23	71.18 ± 15.28	Running	Male Only
Chuensiri et al. (2017)	HIIT	Control (No-exercise)	11	11	59.7 ± 3.9	54.3 ± 3.9	Cycling	Male Only
Tas et al., (2023)	HIIT	Control (No-exercise)	34	6	101.34	91.64	Cycling / Running	Both
Javaheri et al., 2025	HIIT + Diet	Control (Non - Exercise )	53	43	73.58 ± 14.21	77.06 ± 12.27	Running	Male Only														Delta
Abrassi et al. (2018)	HIIT	Control (Non - Exercise)	13	12	78.3 ± 11.6	84.1 ± 9.40	Sprinting, Agility (Jumping, Throwing)	Female Only														HIIT	MICT	CON
Zhang et al., 2017	HIIT	Control (Non - Exercise)	15	15	64.0±6.0	67.6±9.2	Cycling	Female Only														−1.6±3.97	−3.8±5.62	−1.5±5.19
Meng et al (2022)	HIIT	Control (Regular Physical Education)	20	20	52.5 ± 6.2	53.6 ± 4.3	Cycling	Male Only
																						Delta
Rodríguez-Carrillo et al., (2025)	HIIT + Placebo	L-CIT	14	14	89.5 ± 15.3	92.4 ± 15	Cycling	Both														MICT	HIIT	MICT + HIIT	Control
Dias et al. (2017)	HIIT	Nutrition	23	26	70.7 ± 12.9	72.8 ± 20.5	Running	Both														1.2±2.78	1.6±2.55	1.5±2.54	1.3±2.80
Rodríguez-Carrillo et al., (2025)	HIIT + Placebo	HIIT + L-Cit (Nutrition)	14	15	89.5 ± 15.3	85.3 ± 10.2	Cycling	Both
Chuensiri et al. (2017)	HIIT	Supra-HIIT	11	15	59.7 ± 3.9	64.8 ± 3.4	Cycling	Male Only
Cvetković et al., (2018)	HIIT	Football	11	10	71.53 ± 11.23	62.81 ± 13.06	Running	Male Only
(Diatas HIIT) vs Control
Salus et al (2023)	SIT	Control (Non - Exercise)	14	14	90.3 ± 4.1	102.0 ± 6.5	Cycling	Male Only
Chuensiri et al. (2017)	Supra-HIIT (170%)	Control (Non - Exercise)	15	11	64.8 ± 3.4	54.3 ± 3.9	Cycling	Male Only
Cvetković et al., (2018)	Football	Control (Non - Exercise)	10	14	62.81 ± 13.06	71.18 ± 15.28	Running	Male Only

## Sheet: R1 Body Fat% (3)
STUDY ID	Treatment 1	Treatment 2	Treatment 1 sample size	Treatment 2 Sample size	Treatment 1 Outcome	Treatment 2 Outcome	HIIT Treatment Type	Notes
Meng et al. (2022) Effect of	HIIT	Control (Non - Exercise)	12	13	36.2 ± 3.9	39.5 ± 2.1	Running	Male Only
Chuensiri et al. (2017)	HIIT	Control (Non - Exercise)	11	11	21.5 ± 1.6	24.4 ± 1.6	Cycling	Male Only
Abrassi et al. (2018)	HIIT	Control (Non - Exercise)	13	12	32.1 ± 3.42	33.5 ± 3.20	Sprinting, Agility (Jumping, Throwing)	Female Only
Pedro Delgado - Floody et al., (2018)	HIIT	Control (Low intensity exercise)	27	8	20.41 ± 4.06	23.48 ± 5.11	Running, Agility (Jumping, Throwing)	Male Only
Pedro Delgado - Floody et al., (2018)	HIIT	Control (Low intensity exercise)	43	11	26.87 ± 5.97	28.74 ± 5.29	Running, Agility (Jumping, Throwing)	Male Only
Pedro Delgado - Floody et al., (2018)	HIIT	Control (Low intensity exercise)	32	9	16.93 ± 4.26	17.59 ± 4.08	Running, Agility (Jumping, Throwing)	Female Only
Pedro Delgado - Floody et al., (2018)	HIIT	Control (Low intensity exercise)	49	18	24.20 ± 6.37	23.57 ± 7.64	Running, Agility (Jumping, Throwing)	Female Only
Kranen et all (2022)	HIIT	Control (Non - Exercise)	10	9	18.4 ± 6.2	21.9 ± 9.1	Running	Male Only
Zhang et al., (2017)	HIIT	Control	15	13	35.6±2.0	41.4 ± 3.0	Cycling	Female Only	(kg)
Javaheri et al., 2025	HIIT + Diet	Control (Non - Exercise )	53	43	26.43 ± 7.21	26.43 ± 5.87	Running	Male Only
Cvetković et al., (2018)	HIIT	Control	11	14	31.15 ± 6.90	29.60 ± 7.68	Running	Male Only
Tas et al., (2023)	HIIT	Control (No-exercise)	34	6	45.19	44.05	Cycling / Running	Both
Kong et al (2016)	HIIT	MICT	10	18	26.0 ± 6.4	25.3 ± 4.0	Cycling	Male Only
Meng et al. (2022) Effect of	HIIT	MICT	12	11	36.2 ± 3.9	34.4 ± 1.5	Running	Male Only
Zuo et al., (2023)	HIIT	MICT	20	20	21.1 ±5.1	18.9 ±5.2	Running	Male Only
Abrassi et al. (2018)	HIIT	MIIT	13	13	32.1 ± 3.42	32.9 ± 2.93	Sprinting, Agility (Jumping, Throwing)	Female Only
Zhang et al., (2017)	HIIT	MICT	15	15	35.6±2.0	35.6 ± 2.3	Cycling	Female Only	(Kg)
Rodríguez-Carrillo et al., (2025)	HIIT + Placebo	HIIT + L-Cit (Nutrition)	14	15	44 ± 5.94	42.3 ± 4.1	Cycling	Both
Rodríguez-Carrillo et al., (2025)	HIIT + Placebo	L-CIT	14	14	44 ± 5.94	42.4 ± 6.94	Cycling	Both
Chuensiri et al. (2017)	HIIT	Supra-HIIT (170%)	11	15	21.5 ± 1.6	24.8 ± 1.4	Cycling	Male Only
Cvetković et al., (2018)	HIIT	Football	11	10	31.15 ± 6.90	29.60 ± 7.68	Running	Male Only
(Diatas HIIT) vs Control
Chuensiri et al. (2017)	Supra-HIIT (170%)	Control (Non - Exercise)	15	11	24.8 ± 1.4	24.4 ± 1.6	Cycling	Male Only

## Sheet: R1 FM (4)
STUDY ID	Treatment 1	Treatment 2	Treatment 1 sample size	Treatment 2 Sample size	Treatment 1 Outcome	Treatment 2 Outcome	HIIT Treatment Type	Notes
Meng et al. (2022) Effect of	HIIT	Control (Non - Exercise)	12	13	19.3 ± 1.7	23.3 ± 2.6	Running	Male Only
Cvetković et al., (2018)	HIIT	Control	11	14	22.36 ± 6.41	21.55 ± 10.16	Running	Male Only
Galves et al., (2024) Effectiveness	HIIT	Control (Non - Exercise)	20	20	18.74 ± 2.19	29.31 ± 2.64	Running	Both
Kranen et all (2022)	HIIT	Control (Non - Exercise)	10	9	8.3 ± 3.1	11.1 ± 5.2	Running	Male Only
Galvez et al., 2024	HIIT	Con (Non-exercise)	11	12	24.3 ± 2.4	31.0 ± 2.6	Running	Both
Zhang et al., 2017	HIIT	Control (Non - Exercise)	15	15	22.9 ± 3.1	28.1 ± 5.1	Cycling	Female Only
Meng et al (2022)	HIIT	Control (Regular Physical Education)	20	20	21.2 ± 5.1	23.7 ± 5.0	Cycling	Male Only
Dias et al. (2017)	HIIT	Nutrition	18	16	31.0 ± 8.6	29.8 ± 10.3	Running	Both
Rodríguez-Carrillo et al., (2025)	HIIT + Placebo	L-CIT	14	14	39.9 ± 8.2	41.7 ± 10.7	Cycling	Both
Zuo et al., (2023)	HIIT	MICT	20	20	8.4 ±3.4	8.1 ±2.3	Running	Male Only
Meng et al. (2022) Effect of	HIIT	MICT	12	11	19.3 ± 1.7	18.3 ± 3.4	Running	Male Only
Dias et al. (2017)	HIIT	MICT	18	22	31.0 ± 8.6	30.2 ± 10.7	Running	Both
Zhang et al., 2017	HIIT	MICT	15	15	22.9 ± 3.1	23.3 ± 4.0	Cycling	Female Only
Cvetković et al., (2018)	HIIT	Football	11	10	22.36 ± 6.41	21.60 ± 8.47	Running	Male Only
Galves et al., (2024) Effectiveness	HIIT	SIIT (Sprint 100%)	20	20	18.74 ± 2.19	24.67 ± 2.53	Running	Both
Galvez et al., 2024	HIIT	SIIT (Sprint 100%)	11	9	24.3 ± 2.4	26.7 ± 2.6	Running	Both
Rodríguez-Carrillo et al., (2025)	HIIT + Placebo	HIIT + L-Cit (Nutrition)	14	15	39.9 ± 8.2	36 ± 4	Cycling	Both
Cvetković et al., (2018)	Football	Control (Non - Exercise)	10	14	21.60 ± 8.47	21.55 ± 10.16	Running	Male Only

## Sheet: R1 FFM (5)
STUDY ID	Treatment 1	Treatment 2	Treatment 1 sample size	Treatment 2 Sample size	Treatment 1 Outcome	Treatment 2 Outcome	HIIT Treatment Type	Notes
Zuo et al., (2023)	HIIT	MICT	20	20	30.1 ±3.2	28.2 ±3.5	Running	Male Only	Lean Mass
Meng et al. (2022) Effect of	HIIT	MICT	12	11	32.1 ± 4.5	29.4 ± 4.3	Running	Male Only
Dias et al. (2017)	HIIT	MICT	18	22	40.2 ± 8.2	40.1 ± 11.7	Running	Both
Meng et al. (2022) Effect of	HIIT	Control (Non - Exercise)	12	13	32.1 ± 4.5	30.5 ± 3.0	Running	Male Only
Cvetković et al., (2018)	HIIT	Control	11	14	49.17 ± 8.86	49.63 ± 9.18	Running	Male Only	Lean Mass
Dias et al. (2017)	HIIT	Nutrition	18	16	40.2 ± 8.2	38.2 ± 10.0	Running	Both
Galves et al., (2024) Effectiveness	HIIT	Control (Non - Exercise)	20	20	40.74 ± 2.06	41.56 ± 2.48	Running	Both	Lean Mass
Kranen et all (2022)	HIIT	Control (Non - Exercise)	10	9	36.7 ± 5.8	39.2 ± 7.9	Running	Male Only
Galvez et al., 2024	HIIT	Con (Non-exercise)	11	12	42.0 ± 2.6	43.0 ± 2.7	Running	Both	Lean mass
Meng et al (2022)	HIIT	Control (Regular Physical Education)	20	20	21.3 ± 5.3	21.8 ± 3.1	Cycling	Male Only
																						HIIT	MICT	CON
Galves et al., (2024) Effectiveness	HIIT	SIIT (Sprint 100%)	20	20	40.74 ± 2.06	42.08 ± 2.38	Running	Both	Lean Mass													1.9 ± 1.66	-0.8 ± 2.08	1.8 ± 1.08
Cvetković et al., (2018)	HIIT	Football	11	10	49.17 ± 8.86	41.21 ± 5.95	Running	Male Only	Lean Mass
Galvez et al., 2024	HIIT	SIIT (Sprint 100%)	11	9	42.0 ± 2.6	46.7 ± 2.7	Running	Both	Lean mass
Cvetković et al., (2018)	Football	Control (Non - Exercise)	10	14	41.21 ± 5.95	49.63 ± 9.18	Running	Male Only														HIIT	MICT	CON
Galves et al., (2024) Effectiveness	SIIT (Sprint 100%)	Control (Non - Exercise)	20	20	42.08 ± 2.38	41.56 ± 2.48	Running	Both	Lean Mass													1.6 ± 2.65	0.9 ± 3.28	-0.7 ± 3.20
Galvez et al., 2024	SIIT (Sprint 100%)	Con (Non-exercise)	9	12	46.7 ± 2.7	43.0 ± 2.7	Running	Both	Lean mass

## Sheet: R1 SBP (6)
STUDY ID	Treatment 1	Treatment 2	Treatment 1 sample size	Treatment 2 Sample size	Treatment 1 Outcome	Treatment 2 Outcome	HIIT Treatment Type	Notes
Meng et al. (2022) Effect of	HIIT	Control (Non - Exercise)	12	13	110 ± 5	116±4	Running	Male Only
Galves et al., (2024) Effectiveness	HIIT	Control (Non - Exercise)	20	20	116.44 ± 3.11	122.08 ± 3.60	Running	Both
Chuensiri et al. (2017)	HIIT	Control (No-exercise)	11	11	125 ± 4	121 ± 4	Cycling	Male Only
Pedro Delgado - Floody et al., (2018)	HIIT	Control (Low intensity exercise)	27	8	105.85 ± 10.16	106.63 ± 13.08	Running, Agility (Jumping, Throwing)	Male Only
Pedro Delgado - Floody et al., (2018)	HIIT	Control (Low intensity exercise)	43	11	102.61 ± 8.43	99.64 ± 7.72	Running, Agility (Jumping, Throwing)	Male Only
Pedro Delgado - Floody et al., (2018)	HIIT	Control (Low intensity exercise)	32	9	100.26 ± 9.75	106.67 ± 9.53	Running, Agility (Jumping, Throwing)	Female Only
Pedro Delgado - Floody et al., (2018)	HIIT	Control (Low intensity exercise)	49	18	104.79 ± 11.20	102.67 ± 10.22	Running, Agility (Jumping, Throwing)	Female Only
Galvez et al., 2024	HIIT	Con (Non-exercise)	11	12	116.3 ± 3.4	126.5 ± 3.8	Running	Both
Rodríguez-Carrillo et al., (2025)	HIIT + Placebo	L-CIT	14	14	117 ± 8	122 ± 14	Cycling	Both
Galves et al., (2024) Effectiveness	HIIT	SIIT (Sprint 100%)	20	20	116.44 ± 3.11	116.83 ± 3.60	Running	Both
Chuensiri et al. (2017)	HIIT	Supra-HIIT (170%)	11	15	125 ± 4	116 ± 3	Cycling	Male Only														HIIT	MICT	CON
Galvez et al., 2024	HIIT	SIIT (Sprint 100%)	11	9	116.3 ± 3.4	123.0 ± 3.8	Running	Both														-5 ± 2.48	-5 ± 2.78	1 ± 1.78
Rodríguez-Carrillo et al., (2025)	HIIT + Placebo	HIIT + L-Cit (Nutrition)	14	15	116 ± 8	119±7	Cycling	Both
Meng et al. (2022) Effect of	HIIT	MICT	12	11	110 ± 5	114±7*	Running	Male Only
Zuo et al., (2023)	HIIT	MICT	20	20	121.6 ±3.7	122.5 ±3.6	Running	Male Only														MICT	HIIT	MICT + HIIT	Control
																						2.7 ± 2.63	-6.0 ± 3.61	-5.1 ± 3.04	-2.7 ± 2.66
Chuensiri et al. (2017)	Supra-HIIT (170%)	Control (Non - Exercise)	15	11	116 ± 3	121 ± 4	Cycling	Male Only
Galves et al., (2024) Effectiveness	SIIT (Sprint 100%)	Control (Non - Exercise)	20	20	116.83 ± 3.60	122.08 ± 3.60	Running	Both
Galvez et al., 2024	SIIT (Sprint 100%)	Con (Non-exercise)	9	12	123.0 ± 3.8	126.5 ± 3.8	Running	Both
Rodríguez-Carrillo et al., (2025)	HIIT + L-Cit (Nutrition)	L-CIT	15	14	119±7	122 ± 14	Cycling	Both
									Lean Mass
									Lean mass

## Sheet: R1 DBP (7)
STUDY ID	Treatment 1	Treatment 2	Treatment 1 sample size	Treatment 2 Sample size	Treatment 1 Outcome	Treatment 2 Outcome	HIIT Treatment Type	Notes
Meng et al. (2022) Effect of	HIIT	Control (Non - Exercise)	12	13	67±3	71±3.7	Running	Male Only
Chuensiri et al. (2017)	HIIT	Control (No-exercise)	11	11	77 ± 2	74 ± 2	Cycling	Male Only
Pedro Delgado - Floody et al., (2018)	HIIT	Control (Low intensity exercise)	27	8	61.38 ± 16.58	54.63 ± 12.52	Running, Agility (Jumping, Throwing)	Male Only
Pedro Delgado - Floody et al., (2018)	HIIT	Control (Low intensity exercise)	43	11	59.39 ± 8.98	53.91 ± 9.86	Running, Agility (Jumping, Throwing)	Male Only
Pedro Delgado - Floody et al., (2018)	HIIT	Control (Low intensity exercise)	32	9	58.87 ± 8.23	63.22 ± 10.60	Running, Agility (Jumping, Throwing)	Female Only
Pedro Delgado - Floody et al., (2018)	HIIT	Control (Low intensity exercise)	49	18	62.40 ± 9.44	57.89 ± 9.25	Running, Agility (Jumping, Throwing)	Female Only
Galvez et al., 2024	HIIT	Con (Non-exercise)	11	12	64.9 ± 2.3	67.4 ± 2.6	Running	Both
Rodríguez-Carrillo et al., (2025)	HIIT + Placebo	L-CIT	14	14	68 ± 6	72 ± 10	Cycling	Both
Meng et al. (2022) Effect of	HIIT	MICT	12	11	67±3	68±4	Running	Male Only
Zuo et al., (2023)	HIIT	MICT	20	20	78.8 ±7.8	74.1 ±4.8	Running	Male Only
																						HIIT	MICT	CON
Galvez et al., 2024	HIIT	SIIT (Sprint 100%)	11	9	64.9 ± 2.4	61.4 ± 2.6	Running	Both														-2 ± 1.68	-3 ± 1.71	0 ± 1.51
Rodríguez-Carrillo et al., (2025)	HIIT + Placebo	HIIT + L-Cit (Nutrition)	14	15	67 ± 6	68 ± 5	Cycling	Both
Chuensiri et al. (2017)	HIIT	Supra-HIIT (170%)	11	15	77 ± 2	71 ± 2	Cycling	Male Only
Galvez et al., 2024	SIIT (Sprint 100%)	Con (Non-exercise)	9	12	61.4 ± 2.6	67.4 ± 2.6	Running	Both														MICT	HIIT	MICT + HIIT	Control
Rodríguez-Carrillo et al., (2025)	HIIT + L-Cit (Nutrition)	L-CIT	15	14	68 ± 5	72 ± 10	Cycling	Both														-1.2 ± 1.73	-2.9 ± 1.89	-3.9 ± 1.58	0 ± 1.75
Chuensiri et al. (2017)	Supra-HIIT (170%)	Control (Non - Exercise)	15	11	71 ± 2	74 ± 2	Cycling	Male Only

## Sheet: R1 VO2(mlkgmin) (8)
STUDY ID	Treatment 1	Treatment 2	Treatment 1 sample size	Treatment 2 Sample size	Treatment 1 Outcome	Treatment 2 Outcome	HIIT Treatment Type	Notes
Meng et al. (2022) Effect of	HIIT	Control (Non - Exercise)	12	13	47.9 ± 2.6	42.6 ± 2.9	Running	Male Only
Meng et al. (2022) Effect of	HIIT	MICT	12	11	47.9 ± 2.6	45.6 ± 2.1	Running	Male Only
Dias et al. (2017)	HIIT	MICT	22	25	36.6 ± 7.4	33.6 ± 6.3	Running	Both
Dias et al. (2017)	HIIT	Nutrition	22	26	36.6 ± 7.4	32.2 ± 5.9	Running	Both
Chuensiri et al. (2017)	HIIT	Control (No-exercise)	11	11	35.5 ± 1.4	26.4 ± 1.2	Cycling	Male Only
Tas et al., (2023)	HIIT	Control (No-exercise)	34	6	40.93	44.41	Cycling / Running	Both
Meng et al (2022)	HIIT	Control (Regular Physical Education)	20	20	43.8 ± 2.4	39.6 ± 3.2	Cycling	Male Only
Galves et al., (2024) Effectiveness	HIIT	Control (Non - Exercise)	20	20	25.88 ± 0.95	21.77 ± 0.95	Running	Both
Rodríguez-Carrillo et al., (2025)	HIIT + Placebo	L-CIT	14	14	30.9 ± 3.8	32.6 ± 3.4	Cycling	Both
Galvez et al., 2024	HIIT	Con (Non-exercise)	11	12	25.0 ± 1.2	20.6 ± 1.1	Running	Both
Su et al., (2024)	HIIT	MICT	22	22	36.01 ± 6.89	38.26 ± 5.62	Running	Male Only
Zuo et al., (2023)	HIIT	MICT	20	20	32.3 ±3.2	30.2 ±3.1	Running	Male Only
Kong et al (2016)	HIIT	MICT	10	18	36.6 ± 6.6	38.2 ± 6.5	Cycling	Male Only
Galves et al., (2024) Effectiveness	HIIT	SIIT (Sprint 100%)	20	20	25.88 ± 0.95	24.04 ± 1.23	Running	Both
Galvez et al., 2024	HIIT	SIIT (Sprint 100%)	11	9	25.0 ± 1.3	24.2 ± 1.2	Running	Both
Rodríguez-Carrillo et al., (2025)	HIIT + Placebo	HIIT + L-Cit (Nutrition)	14	15	30.9 ± 3.8	27.1 ± 4.9	Cycling	Both
Chuensiri et al. (2017)	HIIT	Supra-HIIT (170%)	11	15	35.5 ± 1.4	30.8 ± 1.0	Cycling	Male Only
Salus et al (2022)	SIT	Control (Non - Exercise)	14	14	33.0 ± 1.2	28.0 ± 1.3	Cycling	Male Only
Chuensiri et al. (2017)	Supra-HIIT (170%)	Control (Non - Exercise)	15	11	30.8 ± 1.0	26.4 ± 1.2	Cycling	Male Only
Galves et al., (2024) Effectiveness	SIIT (Sprint 100%)	Control (Non - Exercise)	20	20	21.77 ± 0.95	24.04 ± 1.23	Running	Both
Galvez et al., 2024	SIIT (Sprint 100%)	Con (Non-exercise)	9	12	20.6 ± 1.1	24.2 ± 1.2	Running	Both
Rodríguez-Carrillo et al., (2025)	HIIT + L-Cit (Nutrition)	L-CIT	15	14	27.1 ± 4.9	32.6 ± 3.4	Cycling	Both

## Sheet: R1 Cholestrol (9)
STUDY ID	Treatment 1	Treatment 2	Treatment 1 sample size	Treatment 2 Sample size	Treatment 1 Outcome	Treatment 2 Outcome	HIIT Treatment Type	Notes
Meng et al. (2022) Effect of	HIIT	Control (Non - Exercise)	12	13	154.68 ± 19.34	162.41 ± 23.20	Running	Male Only	mmol/l	4.0 ± 0.5	4.2 ± 0.6
Meng et al. (2022) Effect of	HIIT	MICT	12	11	154.68 ± 19.34	150.81 ± 19.34	Running	Male Only	mmol/l	4.0 ± 0.6	3.9 ± 0.5
Dias et al. (2017)	HIIT	MICT	19	22	146.56 ± 24.75	164.73 ± 33.64	Running	Both	mmol/l	3.79 ± 0.64	4.26 ± 0.87
Dias et al. (2017)	HIIT	Nutrition	19	19	146.56 ± 24.75	164.35 ± 31.32	Running	Both	mmol/l	3.79 ± 0.64	4.25 ± 0.81
Kranen et all (2022)	HIIT	Control (Non - Exercise)	10	9	129.93 ± 13.53	125.68 ± 22.43	Running	Male Only	mmol/l	3.36 ± 0.35	3.25 ± 0.58
Chuensiri et al. (2017)	HIIT	Control (No-exercise)	11	11	146 ± 8	172 ± 9	Cycling	Male Only
Tas et al., (2023)	HIIT	Control (No-exercise)	34	6	146.26	147.72	Cycling / Running	Both
Rodríguez-Carrillo et al., (2025)	HIIT + Placebo	L-CIT	14	14	161.1 ± 14.2	173 ± 33.3	Cycling	Both
Chuensiri et al. (2017)	HIIT	Supra-HIIT (170%)	11	15	146 ± 8	137 ± 7	Cycling	Male Only
Galves et al., (2024) Effectiveness	HIIT	SIIT (Sprint 100%)	20	20	156.78 ± 9.14	156.20 ± 8.67	Running	Both
Galvez et al., 2024	HIIT	SIIT (Sprint 100%)	11	9	167.8 ± 12.8	146.8 ± 14.0	Running	Both
Rodríguez-Carrillo et al., (2025)	HIIT + Placebo	HIIT + L-Cit (Nutrition)	14	15	161.1 ± 14.1	163.6 ± 29.9	Cycling	Both
Salus et al (2022)	SIT	Control (Non - Exercise)	14	14	154.29 ± 3.87	4.64 ± 0.2	Cycling	Male Only	mmol/l
Chuensiri et al. (2017)	Supra-HIIT (170%)	Control (Non - Exercise)	15	11	137 ± 7	172 ± 9	Cycling	Male Only
Rodríguez-Carrillo et al., (2025)	HIIT + L-Cit (Nutrition)	L-CIT	15	14	163.6 ± 29.9	173 ± 33.3	Cycling	Both

[truncated: 9 more sheets: R1 LDL (10), R1 HDL (10), R1 TG (11), R1 Glucose (12), R1 Insulin (13), R1 HOMA-IR (14), META-REGRESSION, ❌Sheet1, ❌1BMI]
